# Supplementary material for: Chemical Characterization, Antilipidemic Effect and Anti-Obesity Activity of Ludwigia octovalvis in a Murine Model of Metabolic Syndrome
Source: MDPI journal article supplement (doi:10.3390/plants12132578), 2023-07-07
Supplement: s1 [file s1]

# Chemical Characterization, Antilipidemic Effect and Antiobesity Activity of *Ludwigia octovalvis* in a Murine Model of Metabolic Syndrome

Supplementary material

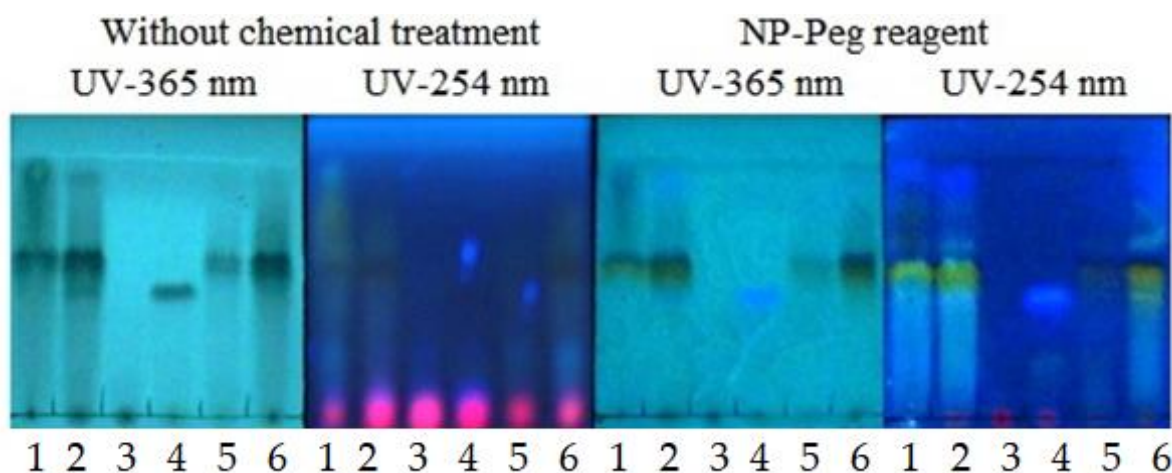

**Figure S1.** Thin-layer chromatography, without chemical treatment and with Natural Products-Polyethylene Glycol (NP-Peg) reagent, of the hydroalcoholic extract of *Ludwigia octovalvis* LHAE (1), its organic fraction LOF (2) and the most representative subfractions of its chemical content: LSF2 (3), LSF3 (4), LSF8 (5) and LSF9 (6). Mobile phase: water/acetonitrile 70/30.

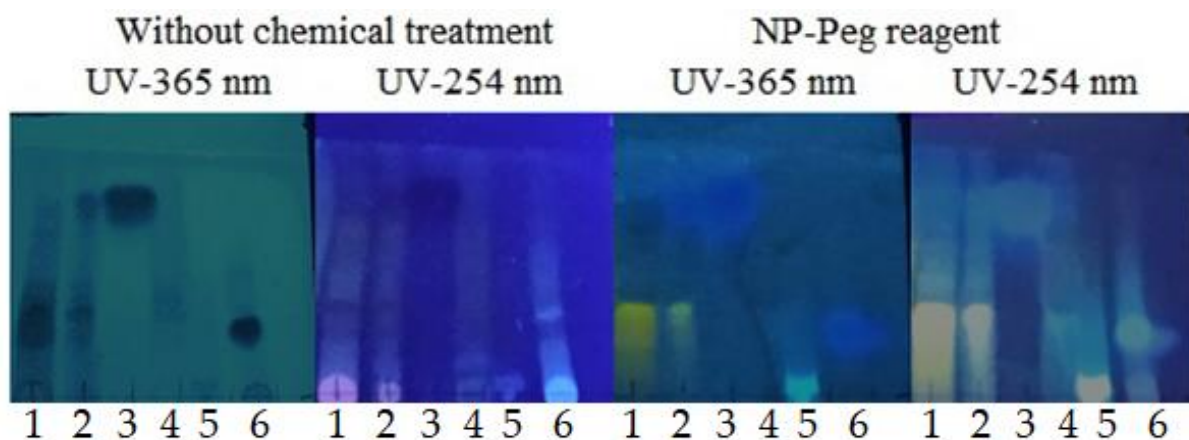

**Figure S2.** Thin-layer chromatography, without chemical treatment and with Natural Products-Polyethylene Glycol (NP-Peg) reagent, of the hydroalcoholic extract of *Ludwigia octovalvis* LHAE (1), its organic fraction LOF (2) and the subfractions LSF8A (3), LSF8B (4), LSF8C (5) and LSF8D (6), obtained from *Ludwigia octovalvis* organic fraction. Mobile phase: water/acetonitrile 60/40.

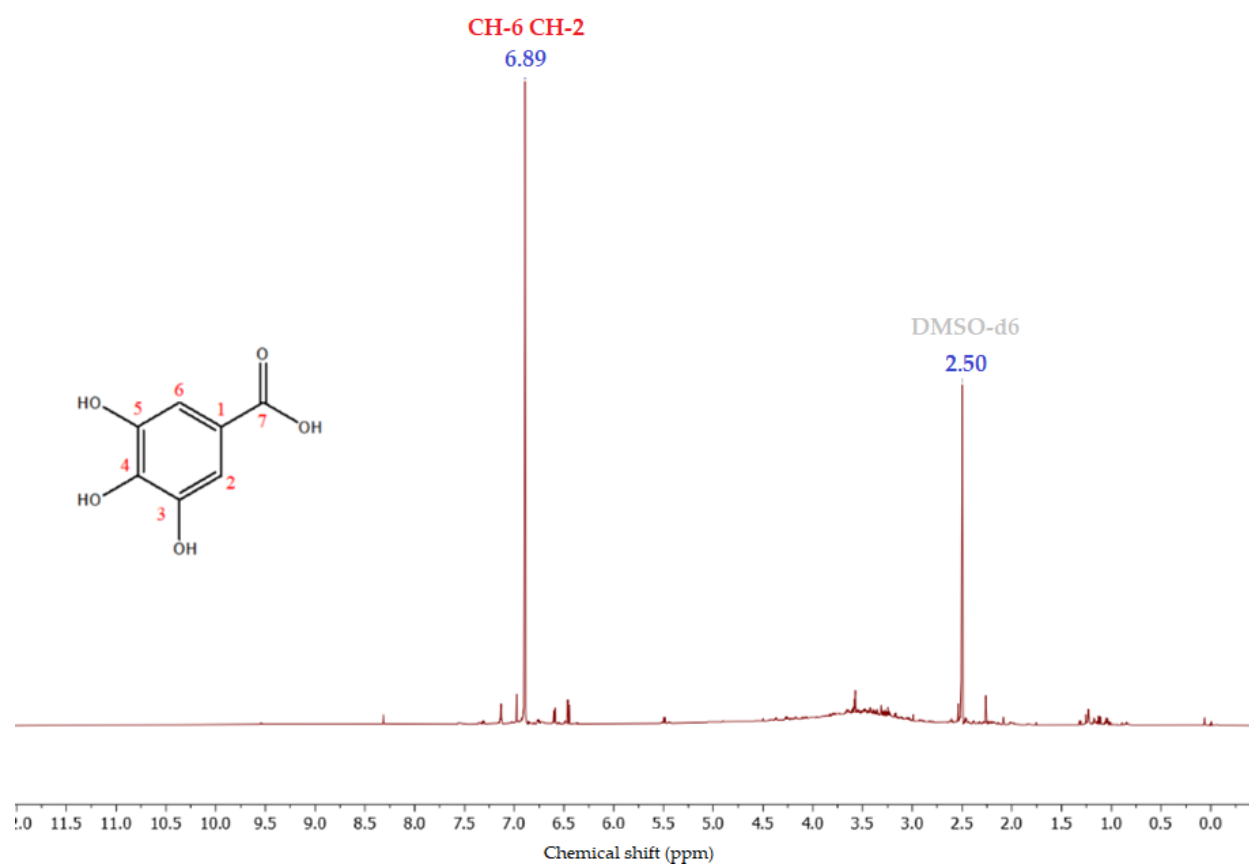

**Figure S3.**  $^1\text{H}$  NMR spectra of the subfraction obtained from *Ludwigia octovalvis* LSF8A and structure of the compound elucidated therein, gallic acid.

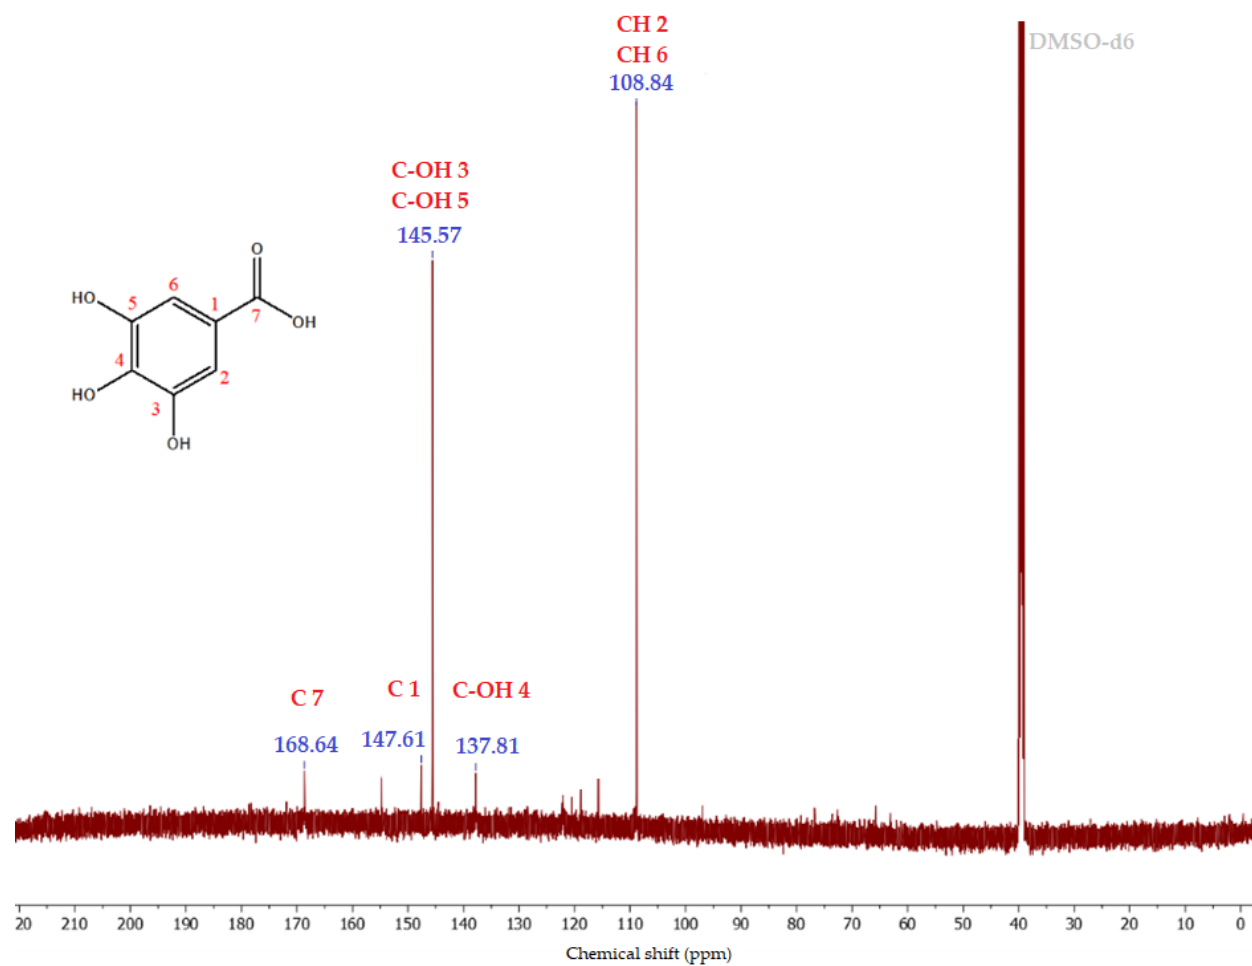

**Figure S4.**  $^{13}\text{C}$  NMR spectra of the subfraction obtained from *Ludwigia octovalvis* LSF8A and structure of the compound elucidated therein, gallic acid.

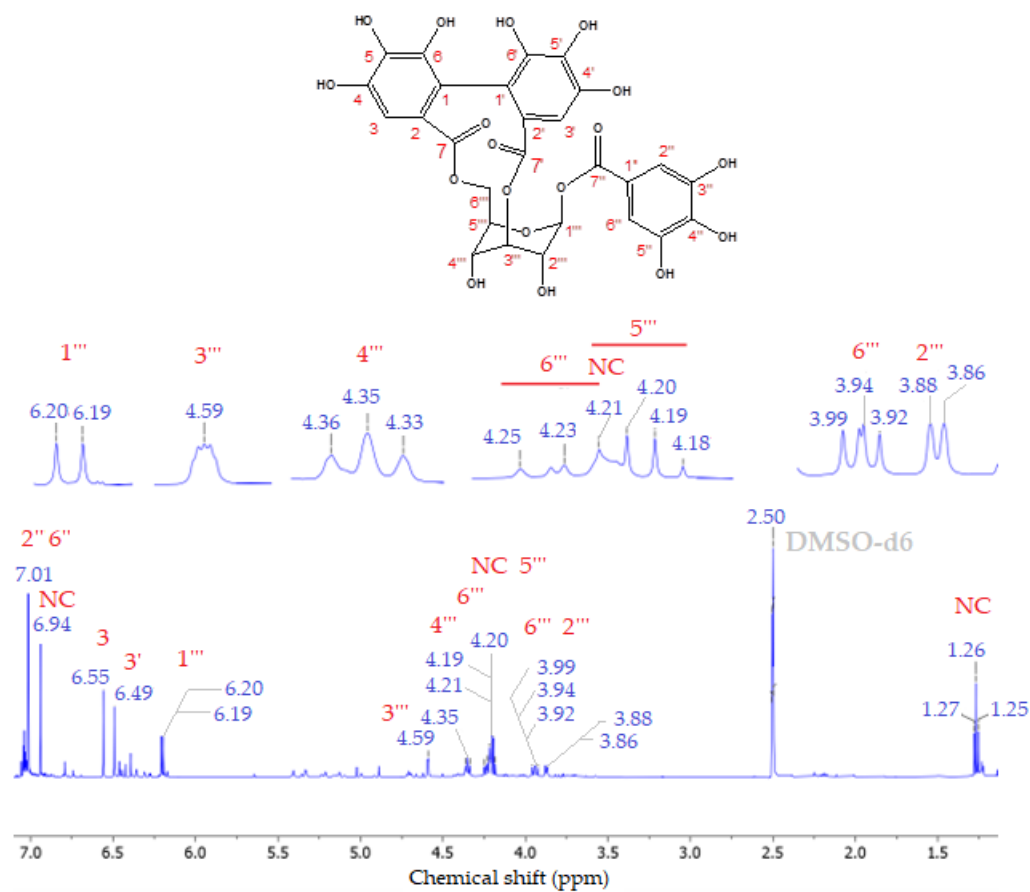

**Figure S5.** <sup>1</sup>H NMR spectra of the subfraction obtained from *Ludwigia octovalvis* LSF8B and structure of the compound elucidated therein, corilagin.

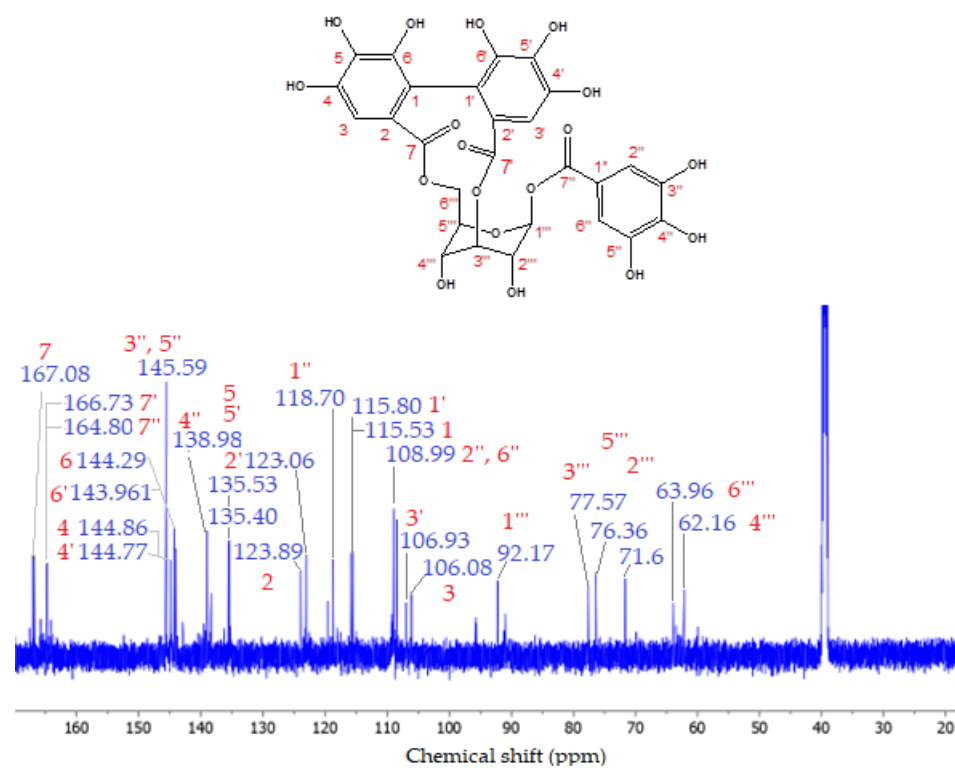

**Figure S6.**  $^{13}\text{C}$  NMR spectra of the subfraction obtained from *Ludwigia octovalvis* LSF8B and structure of the compound elucidated therein, corilagin.

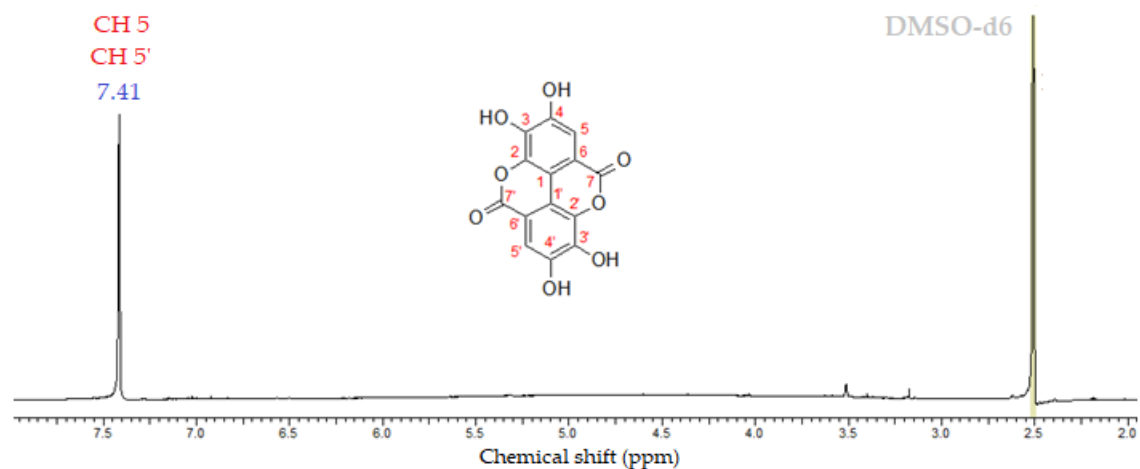

**Figure S7.**  $^1\text{H}$  NMR spectra of the subfraction obtained from *Ludwigia octovalvis* LSF8C and structure of the compound elucidated therein, ellagic acid.

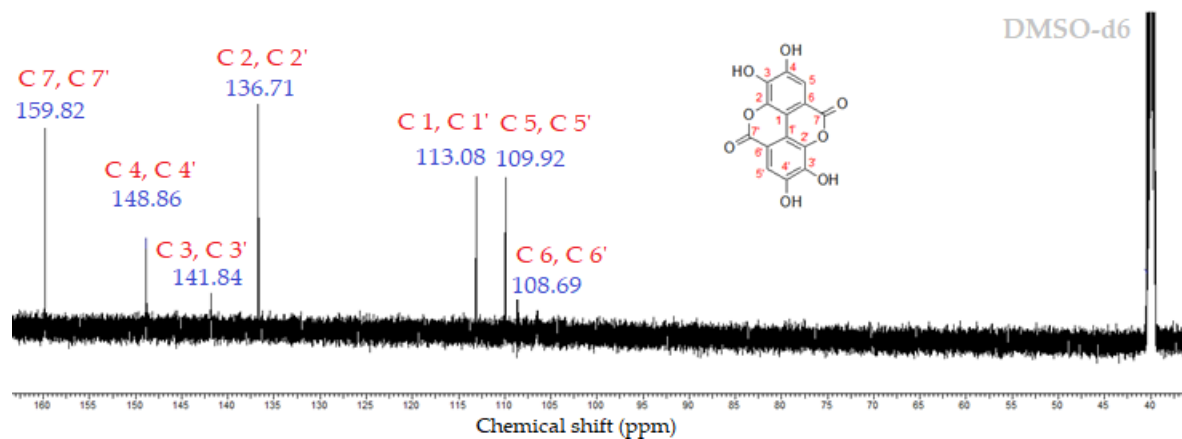

**Figure S8.**  $^{13}\text{C}$  NMR spectra of the subfraction obtained from *Ludwigia octovalvis* LSF8C and structure of the compound elucidated therein, ellagic acid.

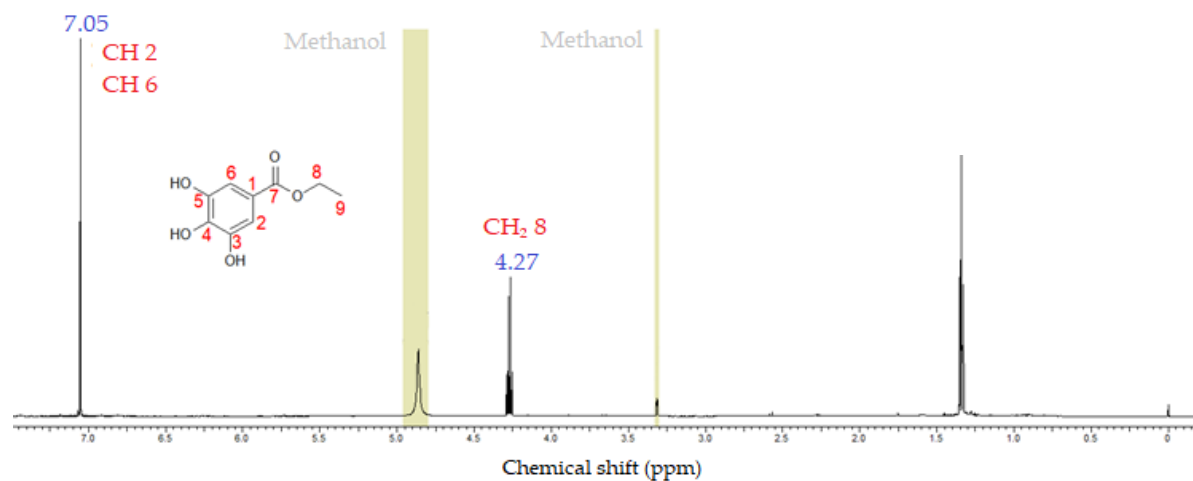

**Figure S9.** <sup>1</sup>H NMR spectra of the subfraction obtained from *Ludwigia octovalvis* LSF8D and structure of the compound elucidated therein, ethyl gallate.

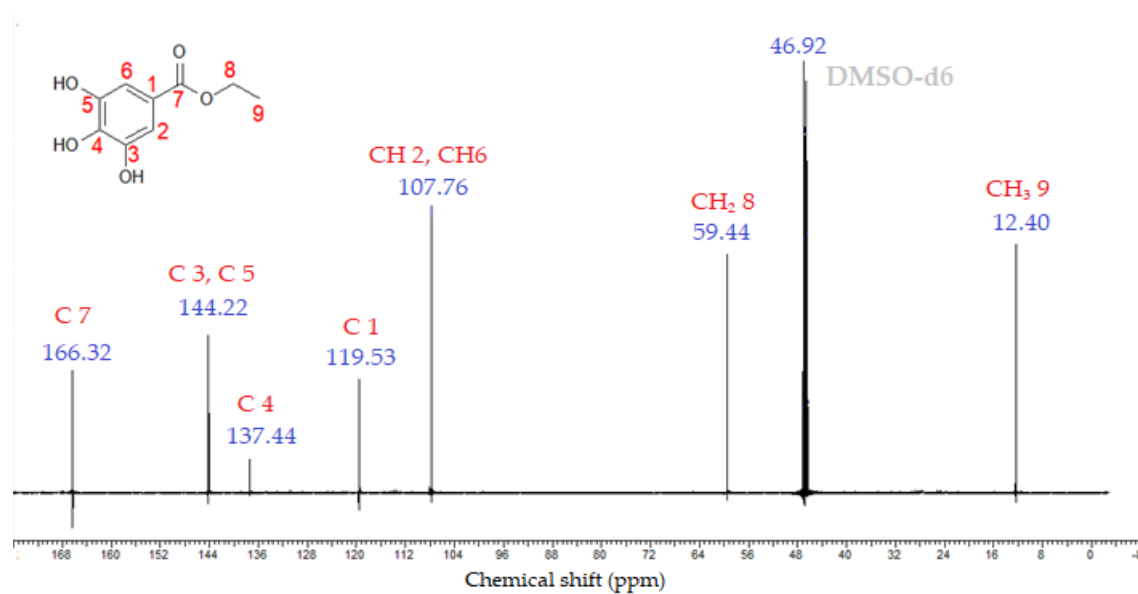

**Figure S10.** <sup>13</sup>C NMR spectra of the subfraction obtained from *Ludwigia octovalvis* LSF8D and structure of the compound elucidated therein, ethyl gallate.
